# Supplementary material for: OsRap2.6 transcription factor contributes to rice innate immunity through its interaction with Receptor for Activated Kinase-C 1 (RACK1)
Source: PubMed Central journal article supplement (PMC4883712; doi:10.1186/1939-8433-5-35), 2012-12-11

# Supplementary Figure S1

**A**

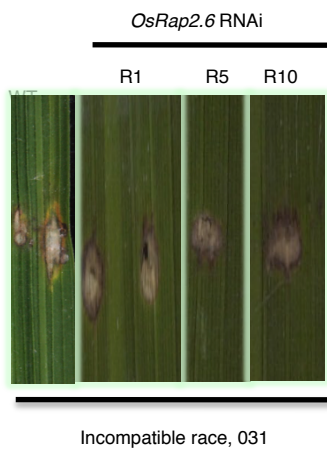

**B**

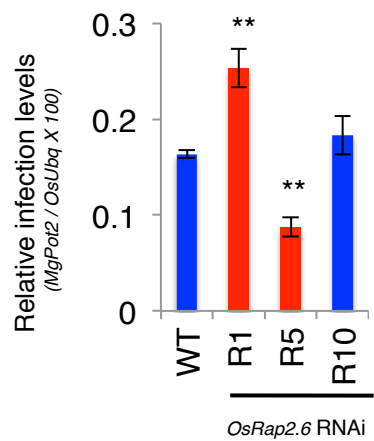

**C**

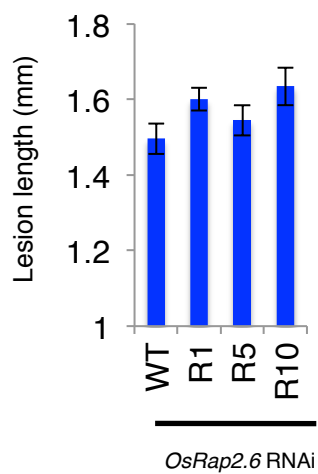

**D**

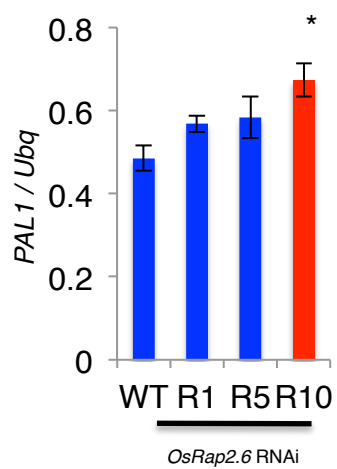

Supplement: 12284_2012_33_MOESM1_ESM.pdf [file 12284_2012_33_MOESM1_ESM.pdf]
