# Supplementary material for: OsRap2.6 transcription factor contributes to rice innate immunity through its interaction with Receptor for Activated Kinase-C 1 (RACK1)
Source: PubMed Central journal article supplement (PMC4883712; doi:10.1186/1939-8433-5-35), 2012-12-11

**A**

|          |     |                                                             |     |
|----------|-----|-------------------------------------------------------------|-----|
| AtRap2.6 | 1   | MVSMITNVSGETE-----PSASATWTMGKREERE--SLPQPLITGSVTKCESSMS     | 54  |
| OsRap2.6 | 1   | MVTRAHWIRAPDLHLPHPSSASAAAIPQQASSVPTAAAAASSPQQLAAAAAEE       | 60  |
| AtRap2.6 | 55  | LEAPKKVRGVQRQRPWKGKJAAEIRDPHKATRVWLGTFTAEAPAAVDAALAFRGSKAKL | 114 |
| OsRap2.6 | 61  | QGRPRHVRGVQRQRPWKGKJAAEIRDPKKAARVWLGTFTAEAPAAVDAALAFRGTAKL  | 120 |
| AtRap2.6 | 115 | NFPEVVGTTIQRNSHFLQNSMQPSLTYIQDCPTLLSYSRQNEQQPLVGMLOFTEENH   | 174 |
| OsRap2.6 | 121 | NFPEVVGATDLGFLVTRGIPPAATHGGVYVPSPPRAGAPPPRQQTVVVPYDLMRYA    | 180 |
| AtRap2.6 | 175 | FFEKPWTEYDQYVNSYSG-----                                     | 192 |
| OsRap2.6 | 181 | QLLQGGVGGVMPFGGARTMSSSTVSSSSAPQILDFTQQLIRAGPPSPMPSSGSGSATA  | 240 |
| AtRap2.6 | 192 | -----                                                       | 192 |
| OsRap2.6 | 241 | RASSSTTSASSPGAWPYGGSERKKKDS                                 | 268 |

**B**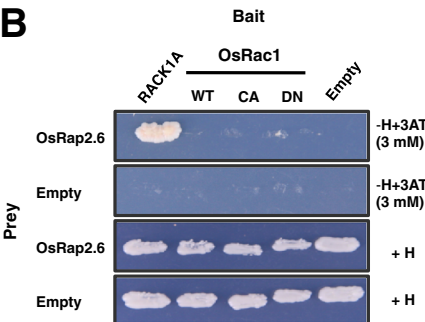**C**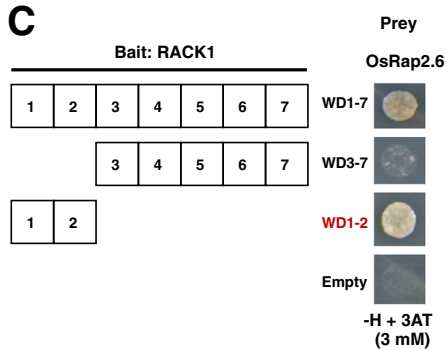

Supplement: 12284_2012_33_MOESM3_ESM.pdf [file 12284_2012_33_MOESM3_ESM.pdf]
